# Supplementary material
Source: ML conference proceedings conference paper supplement (https://openaccess.thecvf.com/content/CVPR2025/html/Wang_A_Comprehensive_Study_CVPR_2025_paper.html)
Supplement: Supplementary file 1 [file Wang_A_Comprehensive_Study_CVPR_2025_supplemental.pdf]

# A Comprehensive Study of Decoder-Only LLMs for Text-to-Image Generation

## Supplementary Material

### A. Training details

We follow the U-Net [8] based latent diffusion architecture from Stable Diffusion v2 [7] with a [replication training framework](#) by MosaicML [11]. We use Diffusers as our main model codebase for the Variational Autoencoder (VAE), U-Net, and noise scheduler [12]. The configurations all follow the original Stable Diffusion [7]. For each model, we swap the text encoder and freeze all components except for the U-Net. Before the text embeddings are input to the U-Net’s cross-attention blocks, we apply a linear projection from each text encoder’s embedding dimension to 1024 output features for all models. The base U-Net has 865,910,724 trainable parameters, and the additional parameters from the projection for each model are shown in Table A.

For training, we use a 46 million text-image pair subset of the LAION-Aesthetics dataset [9]. We perform center cropping on all training images and LLM-based caption up-sampling with VisualFactChecker (VFC) [2]. We train all models for 800,000 iterations at  $256 \times 256$  resolution with a global batch size of 2,048 on 32 A100 GPUs. We use a caption drop probability of 0.1 and use the AdamW optimizer [5] with a learning rate of  $10^{-4}$  and weight decay of 0.01. We also use additional optimizations such as FlashAttention [1], [half precision GroupNorm](#), [half precision LayerNorm](#), and Fully Sharded Data Parallel’s (FSDP) [13] `SHARD_GRAD_OP` mode for enhanced GPU scaling [11]. Notably, we also pre-compute the VAE image latents and text embeddings for the entire training dataset to reduce repetitive compute time and costs, with each model taking around 7 days to fully train.

### B. Prompt upsampling

#### B.1. Prompting

We use the instruction fine-tuned [Gemma2-9B](#) [10] to perform prompt upsampling at inference. We use the following prompt:

```
You are part of a team that creates images
from texts. You work with an assistant
that will draw anything you say. For
example, outputting "a beautiful morning
in the woods with the sun peaking
through the trees" will trigger your
partner to output an image of a forest
morning, as you described.
```

```
You are responsible for helping people
create detailed, amazing images. The way
```

```
to accomplish this is to take their
short prompts and make them extremely
detailed and descriptive.
```

There are a few rules to follow:

- Try to start with the original input prompt in your output, and then add details after.
- You will only ever output a single image description per user request.
- Image descriptions must be between 15-80 words. Extra words will be ignored.

With the following generation parameters:

```
do_sample=True
temperature=0.01
top_p=1.0
max_new_tokens=1024
```

#### B.1.1. Examples

In this subsection, we list a few examples of the upsampled prompts from GenAI-Bench [4] that are used in Figure 4:

*A tomato vine with several tomatoes on it, all yellow except the largest which is red*  $\Rightarrow$  “A tomato vine with several tomatoes on it, all yellow except the largest which is red. The vine is thick and green, with leaves that are a deep, rich green. The tomatoes are plump and juicy, glistening in the sunlight. The largest tomato, a vibrant red, hangs heavy on the vine, contrasting beautifully with the yellow fruit around it.”

*A tomato vine with several tomatoes on it, all yellow except the largest which is red*  $\Rightarrow$  “A larger gorilla hands a smaller mechanical monkey a banana. The gorilla is silver-back, with thick fur and a wise expression in its eyes. The mechanical monkey is made of polished brass, with intricate gears visible on its chest and limbs. It has glowing red eyes and a mischievous grin. The banana is ripe and yellow, held out in the gorilla’s massive hand. The background is a lush jungle, with vines and ferns creating a vibrant tapestry.”

### C. VQAScore evaluation

#### C.1. VQAScore details

VQAScore is a metric for evaluating how well a generated image semantically aligns with its text prompt by using visual-question-answering (VQA). It ranges from 0 to 1, where scores closer to 1 represent close alignment with the prompt, and 0 means the generated image doesn’t at all. Intuitively, it measures how well the image understands and

| Text Encoders                                        | Embedding Dimension | Extra Parameters |
|------------------------------------------------------|---------------------|------------------|
| CLIP, T5                                             | 1024                | 1,048,576        |
| Qwen2-1.5B                                           | 1536                | 1,572,864        |
| Gemma2-2B                                            | 2304                | 2,359,296        |
| Qwen2-7B, Gemma2-9B, gte-Gwen2, bge-Gemma2           | 3584                | 3,670,016        |
| Mistral-7B, Llama3-8B, sfr-Mistral, Mistral-Instruct | 4096                | 4,194,304        |

Table A. Additional trainable parameters from adding a linear projection layer from text encoder’s embedding dimensions to 1024 output features before cross-attention.

| Model       | Embeddings | Avg          | Attr.        | Scene        | Spat.        | Action       | Part         | Count.       | Comp.        | Differ.      | Neg.         | Uni.         |
|-------------|------------|--------------|--------------|--------------|--------------|--------------|--------------|--------------|--------------|--------------|--------------|--------------|
| T5-XXL      | last layer | 0.741        | 0.737        | 0.809        | 0.741        | 0.782        | 0.723        | 0.677        | 0.717        | 0.675        | 0.599        | 0.757        |
| T5-XXL      | norm avg   | 0.747        | 0.748        | 0.813        | 0.745        | 0.780        | 0.720        | 0.687        | 0.736        | 0.675        | 0.617        | 0.760        |
| Qwen2-7B    | last layer | 0.683        | 0.679        | 0.805        | 0.670        | 0.724        | 0.657        | 0.588        | 0.603        | 0.590        | 0.552        | 0.763        |
| Qwen2-7B    | norm avg   | 0.740        | 0.741        | 0.823        | 0.740        | 0.772        | 0.731        | 0.680        | 0.704        | 0.683        | 0.589        | 0.739        |
| Mistral-7B  | last layer | 0.675        | 0.667        | 0.763        | 0.665        | 0.711        | 0.641        | 0.576        | 0.556        | 0.526        | 0.524        | 0.726        |
| Mistral-7B  | norm avg   | 0.769        | 0.774        | 0.837        | 0.780        | 0.802        | 0.733        | 0.699        | 0.716        | 0.706        | 0.630        | 0.789        |
| Llama3-8B   | last layer | 0.675        | 0.673        | 0.767        | 0.656        | 0.704        | 0.667        | 0.627        | 0.615        | 0.568        | 0.542        | 0.768        |
| Llama3-8B   | norm avg   | 0.744        | 0.744        | 0.831        | 0.744        | 0.783        | 0.705        | 0.704        | 0.675        | 0.659        | 0.628        | 0.782        |
| Gemma2-9B   | last layer | 0.710        | 0.709        | 0.794        | 0.711        | 0.760        | 0.705        | 0.642        | 0.659        | 0.617        | 0.544        | 0.709        |
| Gemma2-9B   | norm avg   | 0.753        | 0.757        | 0.814        | 0.743        | 0.790        | 0.735        | 0.691        | 0.703        | 0.679        | 0.651        | 0.770        |
| gte-Qwen2   | last layer | 0.482        | 0.486        | 0.537        | 0.479        | 0.497        | 0.466        | 0.446        | 0.393        | 0.405        | 0.424        | 0.437        |
| gte-Qwen2   | norm avg   | 0.654        | 0.647        | 0.746        | 0.626        | 0.696        | 0.632        | 0.539        | 0.619        | 0.536        | 0.538        | 0.683        |
| sfr-Mistral | last layer | 0.710        | 0.706        | 0.804        | 0.707        | 0.740        | 0.691        | 0.661        | 0.670        | 0.615        | 0.608        | 0.766        |
| sfr-Mistral | norm avg   | 0.750        | 0.745        | 0.839        | 0.762        | 0.782        | 0.713        | 0.677        | 0.715        | 0.706        | 0.610        | 0.785        |
| bge-Gemma2  | last layer | 0.737        | 0.730        | 0.824        | 0.729        | 0.793        | 0.722        | 0.662        | 0.654        | 0.641        | 0.623        | 0.797        |
| bge-Gemma2  | norm avg   | <b>0.789</b> | <b>0.787</b> | <b>0.846</b> | <b>0.782</b> | <b>0.821</b> | <b>0.786</b> | <b>0.745</b> | <b>0.776</b> | <b>0.744</b> | <b>0.712</b> | <b>0.810</b> |

Table B. VQAScore for models using different embedding strategies: standard last-layer embeddings (last layer) and average embeddings across all normalized layers (norm avg). Highest scores are shown in **bold**. Our results show that using layer-normalized averaging significantly enhances performance and most models outperform T5.

represents the prompt, going beyond surface-level similarity. Please refer to the original VQAScore paper [4] for further insight.

## C.2. Additional layer-normalized averaging results

We report additional results for our models using layer-normalized average embeddings, which aggregate representations across all layers. Table B presents a comprehensive comparison with the baseline T5 model and models utilizing last-layer embeddings.

## C.3. Original CLIP-FlanT5 model

We show results for our models evaluated using the original VQAScore implementation in Tables C, D, E, F, G. As can be seen in these tables, the [custom CLIP-FlanT5 model](#) introduced in VQAScore paper [4] is not as capable as GPT-

4o [3] in discriminating between different models, but still show correlated trends to the GPT-4o results.

## C.4. Our GPT-4o implementation

We build upon VQAScore’s support for GPT-4v by replicating the [code](#) and [swapping](#) in the GPT-4o API instead. We also limit the number of tokens returned by setting `top_logprobs = 20`. We found that a simple retry up to 3 times eliminated almost all errors, such as timeout and invalid answer token selections. Apart from enhanced performance, GPT-4o also includes support for prompt caching, allowing for reduced time and costs.

## C.5. Random variation

When computing VQAScore with GPT-4o, we generate the 1600 images of upsampled GenAI-Bench prompts for each

| Model                          | Size | Avg   | Attr. | Scene | Spat. | Action | Part  | Count. | Comp. | Differ. | Neg.  | Uni.  |
|--------------------------------|------|-------|-------|-------|-------|--------|-------|--------|-------|---------|-------|-------|
| CLIP <sub>ViT-H/14</sub>       | 354M | 0.761 | 0.762 | 0.790 | 0.765 | 0.762  | 0.749 | 0.755  | 0.758 | 0.729   | 0.710 | 0.771 |
| T5-XXL                         | 4.7B | 0.795 | 0.795 | 0.816 | 0.803 | 0.803  | 0.780 | 0.799  | 0.800 | 0.793   | 0.739 | 0.804 |
| Qwen2-7B                       | 7B   | 0.772 | 0.772 | 0.798 | 0.777 | 0.782  | 0.761 | 0.760  | 0.759 | 0.748   | 0.712 | 0.785 |
| Mistral-7B                     | 7B   | 0.767 | 0.765 | 0.787 | 0.771 | 0.771  | 0.751 | 0.756  | 0.753 | 0.733   | 0.710 | 0.780 |
| Llama3-8B                      | 8B   | 0.770 | 0.769 | 0.795 | 0.773 | 0.775  | 0.767 | 0.767  | 0.768 | 0.757   | 0.721 | 0.793 |
| Gemma2-9B                      | 9B   | 0.782 | 0.782 | 0.801 | 0.790 | 0.787  | 0.776 | 0.781  | 0.779 | 0.769   | 0.708 | 0.784 |
| gte-Qwen2                      | 7B   | 0.597 | 0.605 | 0.604 | 0.609 | 0.579  | 0.588 | 0.602  | 0.620 | 0.605   | 0.605 | 0.611 |
| sfr-Mistral                    | 7B   | 0.782 | 0.780 | 0.810 | 0.790 | 0.782  | 0.768 | 0.786  | 0.786 | 0.777   | 0.738 | 0.794 |
| Mistral-7B <sub>Instruct</sub> | 7B   | 0.777 | 0.776 | 0.799 | 0.781 | 0.781  | 0.765 | 0.782  | 0.771 | 0.758   | 0.720 | 0.782 |
| bge-Gemma2                     | 9B   | 0.786 | 0.782 | 0.808 | 0.790 | 0.790  | 0.774 | 0.786  | 0.773 | 0.781   | 0.750 | 0.792 |

Table C. Original VQAScore for models using embeddings extracted from the last layer. We use text encoders from CLIP-ViT-H/14 (354M) and T5-XXL (4.7B), along with four popular open-source pre-trained LLMs: Qwen2 (7B), Mistral-7B (7B), Llama3 (8B), and Gemma2 (9B). Additionally, we include three embedding models fine-tuned on these LLMs: gte-Qwen2 (gte-Qwen2-7B-instruct; 7B), sfr-Mistral (SFR-Embedding-2\_R; 7B), and bge-Gemma2 (bge-multilingual-gemma2; 9B). We also include an instruction fine-tuned model, Mistral-7B-Instruct (7B).

| Model      | Layer     | Avg   | Attr. | Scene | Spat. | Action | Part  | Count. | Comp. | Differ. | Neg.  | Uni.  |
|------------|-----------|-------|-------|-------|-------|--------|-------|--------|-------|---------|-------|-------|
| T5-XXL     | 25 (last) | 0.795 | 0.795 | 0.816 | 0.803 | 0.803  | 0.780 | 0.799  | 0.800 | 0.793   | 0.739 | 0.804 |
| Mistral-7B | 33 (last) | 0.782 | 0.780 | 0.810 | 0.790 | 0.782  | 0.768 | 0.786  | 0.786 | 0.777   | 0.738 | 0.794 |
| Mistral-7B | 32        | 0.783 | 0.782 | 0.802 | 0.785 | 0.790  | 0.775 | 0.783  | 0.766 | 0.779   | 0.726 | 0.786 |
| Mistral-7B | 15        | 0.783 | 0.785 | 0.811 | 0.787 | 0.788  | 0.774 | 0.795  | 0.783 | 0.779   | 0.724 | 0.783 |
| Mistral-7B | 0 (first) | 0.660 | 0.661 | 0.702 | 0.657 | 0.646  | 0.630 | 0.655  | 0.680 | 0.640   | 0.605 | 0.692 |

Table D. Original VQAScore for models using embeddings extracted from individual layers of Mistral-7B (7B). We include the baseline T5-XXL (4.7B) model using embeddings extracted from the last layer as a reference.

model. The variation resulting from the choice of random seeds is in the order of  $\pm 0.004$ , depending on the category. The variation from the same seed is  $\pm 0.003$ , from non-deterministic CUDA operations and possible non-determinism of the GPT-4o queries.

## D. More visual comparisons

We provide additional visual comparisons between the baseline CLIP and T5 models using last-layer embeddings with the Mistral and bge-Gemma2 models using layer-normalized average embeddings. Figure A shows examples from common text-to-image prompts, and Figure B shows additional prompts from GenAI-Bench.



CLIP (*last layer*)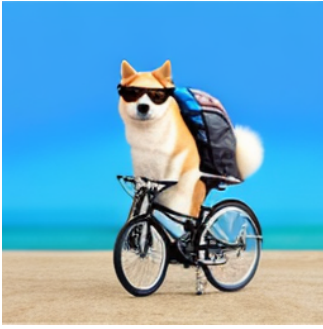T5-XXL (*last layer*)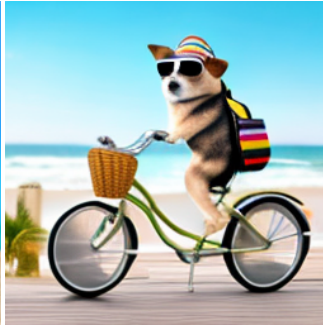Mistral (*norm avg*)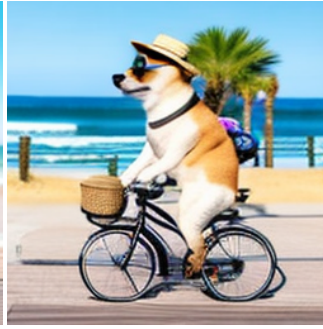bge-Gemma2 (*norm avg*)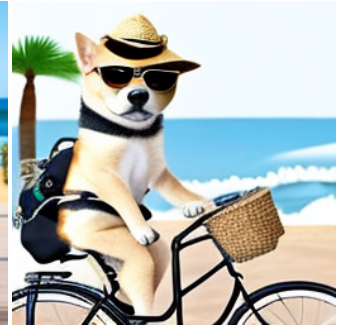

*A photo of a Shiba Inu dog with a backpack riding a bike. It is wearing sunglasses and a beach hat.*

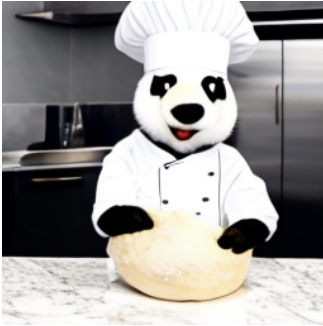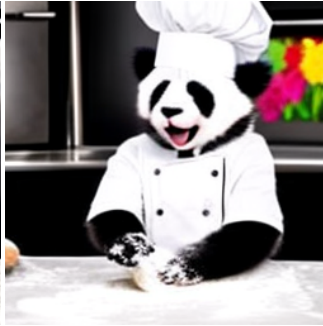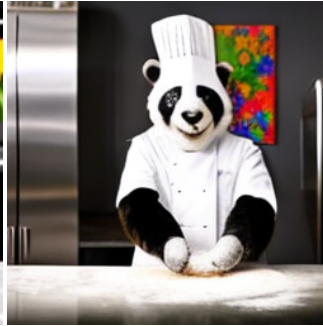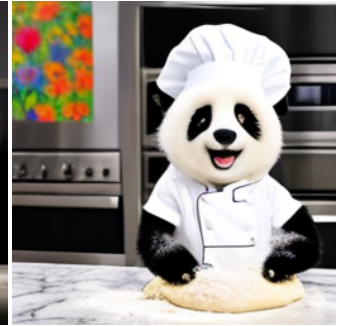

*A high contrast portrait of a very happy fuzzy panda dressed as a chef in a high end kitchen making dough. There is a painting of flowers on the wall behind him.*

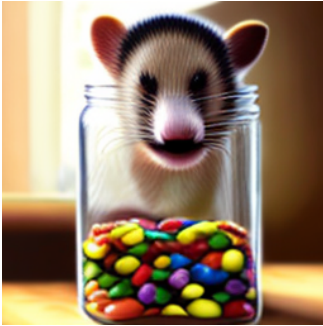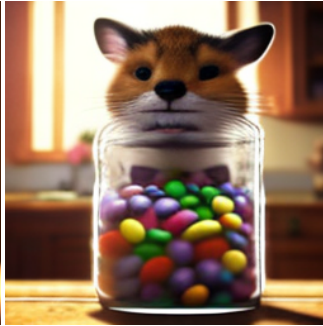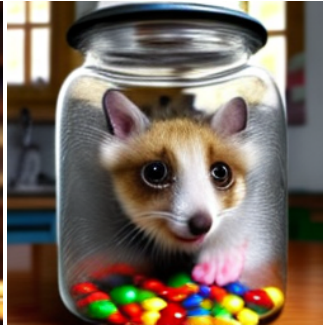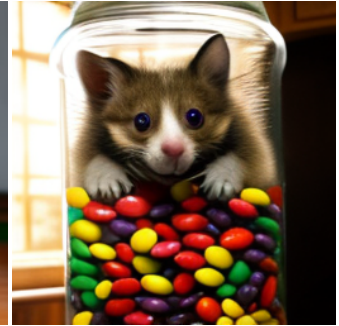

*A mischievous ferret with a playful grin squeezes itself into a large glass jar, surrounded by colorful candy. The jar sits on a wooden table in a cozy kitchen, and warm sunlight filters through a nearby window.*

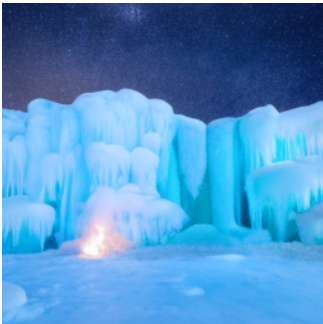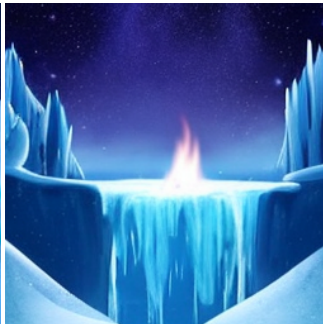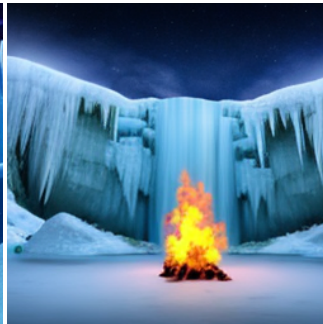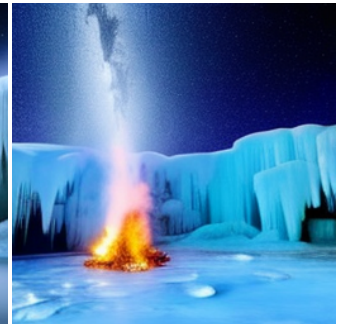

*An icy landscape under a starlit sky, where a magnificent frozen waterfall flows over a cliff. In the center of the scene, a fire burns bright, its flames seemingly frozen in place, casting a shimmering glow on the surrounding ice and snow.*

Figure A. Visual comparison of images generated with different text encoders. We use last-layer embeddings (*last layer*) from the text encoders of [CLIP-ViT-H/14](#) (354M) and [T5-XXL](#) (4.7B). We also use average layer-normalized embeddings (*norm avg*) from the pre-trained LLM [Mistral-7B](#) (7B) and the fine-tuned embedding model [bge-Gemma2](#) ([bge-multilingual-gemma2](#); 9B).



CLIP (*last layer*)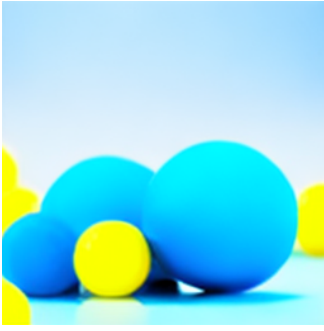T5-XXL (*last layer*)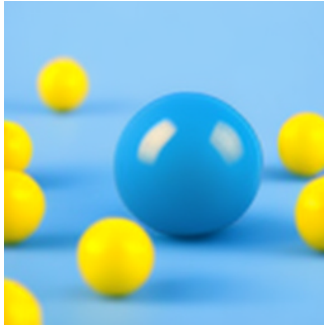Mistral (*norm avg*)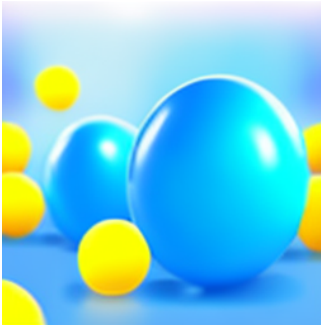bge-Gemma2 (*norm avg*)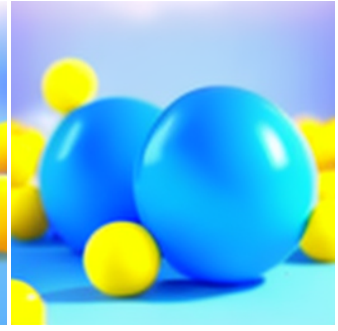

*A scene with two blue balls amidst many yellow ones. The blue balls are slightly larger than the yellow ones and have a smooth, glossy surface that reflects the light.*

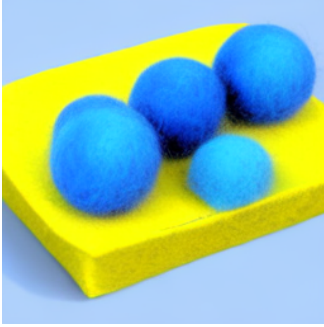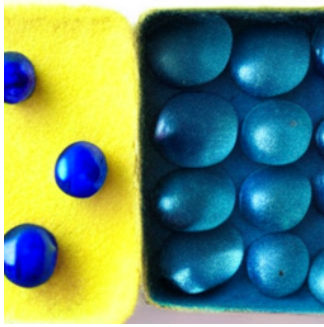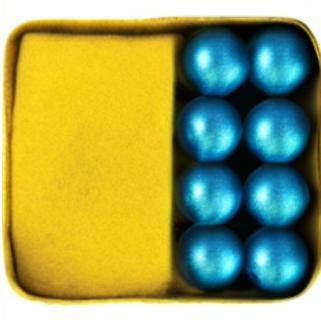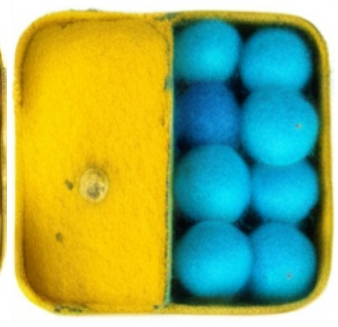

*A yellow felt box has no metallic blue spheres on the left side and has blue metallic spheres on the right side.*

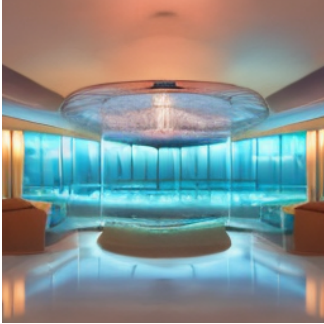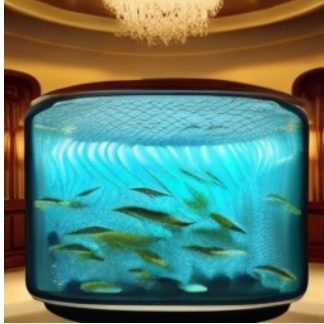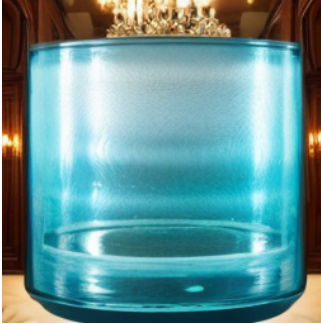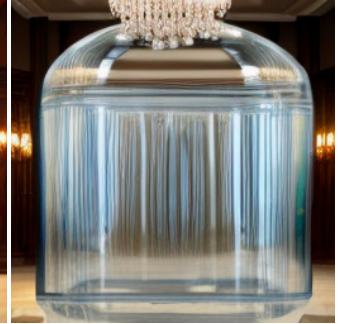

*There is a large fish aquarium in the center of the luxurious living room, but there are no fish in it. The aquarium is made of polished, rippling glass, reflecting the warm glow of the chandelier above.*

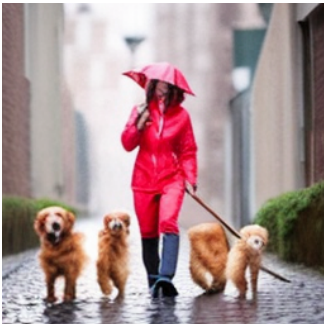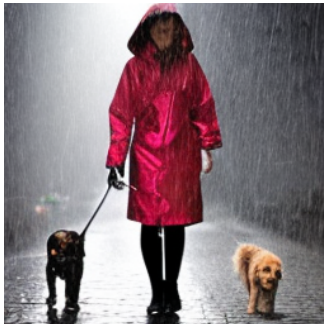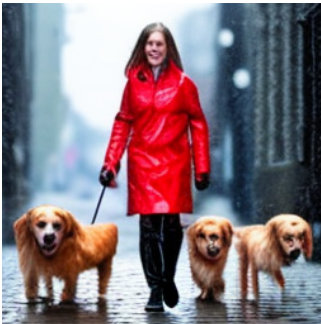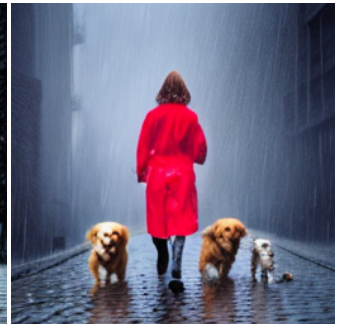

*A woman with three dogs and no umbrella in the drizzle. Two golden retrievers bound ahead, their tails wagging despite the light rain, while a small terrier trots obediently by her side.*

Figure B. Visual comparison of images generated with different text encoders. We use last-layer embeddings (*last layer*) from the text encoders of [CLIP-ViT-H/14](#) (354M) and [T5-XXL](#) (4.7B). We also use average layer-normalized embeddings (*norm avg*) from the pre-trained LLM [Mistral-7B](#) (7B) and the fine-tuned embedding model [bge-Gemma2](#) ([bge-multilingual-gemma2](#); 9B).

| Model      | Embeddings | Avg   | Attr. | Scene | Spat. | Action | Part  | Count. | Comp. | Differ. | Neg.  | Uni.  |
|------------|------------|-------|-------|-------|-------|--------|-------|--------|-------|---------|-------|-------|
| T5-XXL     | last layer | 0.795 | 0.795 | 0.816 | 0.803 | 0.803  | 0.780 | 0.799  | 0.800 | 0.793   | 0.739 | 0.804 |
| T5-XXL     | norm avg   | 0.791 | 0.795 | 0.810 | 0.799 | 0.796  | 0.771 | 0.795  | 0.813 | 0.783   | 0.730 | 0.799 |
| bge-Gemma2 | last layer | 0.786 | 0.782 | 0.808 | 0.790 | 0.790  | 0.774 | 0.786  | 0.773 | 0.781   | 0.750 | 0.792 |
| bge-Gemma2 | avg        | 0.809 | 0.807 | 0.822 | 0.815 | 0.814  | 0.793 | 0.811  | 0.813 | 0.794   | 0.755 | 0.807 |
| bge-Gemma2 | norm avg   | 0.801 | 0.801 | 0.821 | 0.806 | 0.806  | 0.790 | 0.803  | 0.805 | 0.789   | 0.758 | 0.813 |
| Mistral-7B | last layer | 0.782 | 0.780 | 0.810 | 0.790 | 0.782  | 0.768 | 0.786  | 0.786 | 0.777   | 0.738 | 0.794 |
| Mistral-7B | avg        | 0.786 | 0.785 | 0.809 | 0.797 | 0.793  | 0.774 | 0.783  | 0.780 | 0.761   | 0.726 | 0.788 |
| Mistral-7B | norm avg   | 0.799 | 0.798 | 0.820 | 0.808 | 0.810  | 0.789 | 0.791  | 0.796 | 0.790   | 0.734 | 0.805 |

Table E. Original VQAScore for models using different embedding strategies: standard last-layer embeddings (*last layer*), average embeddings across all layers (*avg*), and average embeddings across all normalized layers (*norm avg*). We evaluate the encoder from [T5-XXL](#) (4.7B), the pre-trained LLM [Mistral-7B](#) (7B), and the fine-tuned embedding model [bge-multilingual-gemma2](#) (9B).

| Model                         | Avg   | Attr. | Scene | Spat. | Action | Part  | Count. | Comp. | Differ. | Neg.  | Uni.  |
|-------------------------------|-------|-------|-------|-------|--------|-------|--------|-------|---------|-------|-------|
| bge-Gemma2                    | 0.786 | 0.782 | 0.808 | 0.790 | 0.790  | 0.774 | 0.786  | 0.773 | 0.781   | 0.750 | 0.792 |
| bge-Gemma2 <sub>pooled</sub>  | 0.802 | 0.801 | 0.828 | 0.807 | 0.806  | 0.789 | 0.812  | 0.806 | 0.799   | 0.763 | 0.835 |
| sfr-Mistral                   | 0.782 | 0.780 | 0.810 | 0.790 | 0.782  | 0.768 | 0.786  | 0.786 | 0.777   | 0.738 | 0.794 |
| sfr-Mistral <sub>pooled</sub> | 0.782 | 0.778 | 0.810 | 0.779 | 0.788  | 0.774 | 0.778  | 0.772 | 0.772   | 0.739 | 0.796 |

Table F. Original VQAScore for models using embeddings extracted from the last layer compared to models with additional conditioning on global pooled embeddings [6]. We evaluate the fine-tuned embedding models [bge-multilingual-gemma2](#) (9B) and [sfr-Embedding-2\\_R](#) (7B).

| Model  | Size | Avg   | Attr. | Scene | Spat. | Action | Part  | Count. | Comp. | Differ. | Neg.  | Uni.  |
|--------|------|-------|-------|-------|-------|--------|-------|--------|-------|---------|-------|-------|
| Qwen2  | 1.5B | 0.758 | 0.759 | 0.784 | 0.761 | 0.760  | 0.738 | 0.756  | 0.753 | 0.747   | 0.704 | 0.755 |
| Qwen2  | 7B   | 0.772 | 0.772 | 0.798 | 0.777 | 0.782  | 0.761 | 0.760  | 0.759 | 0.748   | 0.712 | 0.785 |
| Gemma2 | 2B   | 0.770 | 0.773 | 0.797 | 0.774 | 0.774  | 0.759 | 0.783  | 0.764 | 0.756   | 0.710 | 0.787 |
| Gemma2 | 9B   | 0.782 | 0.782 | 0.801 | 0.790 | 0.787  | 0.776 | 0.781  | 0.779 | 0.769   | 0.708 | 0.784 |

Table G. Original VQAScore for models with different LLM sizes, using embeddings extracted from the last layer. We evaluate the pre-trained LLMs: [Qwen2](#) (1.5B), [Qwen2](#) (7B), [Gemma2](#) (2B), [Gemma2](#) (9B).

## References

- [1] Tri Dao, Dan Fu, Stefano Ermon, Atri Rudra, and Christopher Ré. Flashattention: Fast and memory-efficient exact attention with io-awareness. In *NeurIPS*, 2022. [1](#)
- [2] Yunhao Ge, Xiaohui Zeng, Jacob Samuel Huffman, Tsung-Yi Lin, Ming-Yu Liu, and Yin Cui. Visual fact checker: enabling high-fidelity detailed caption generation. In *CVPR*, 2024. [1](#)
- [3] Aaron Hurst, Adam Lerer, Adam P Goucher, Adam Perelman, Aditya Ramesh, Aidan Clark, AJ Ostrow, Akila Welihinda, Alan Hayes, Alec Radford, et al. Gpt-4o system card. *arXiv preprint arXiv:2410.21276*, 2024. [2](#)
- [4] Zhiqiu Lin, Deepak Pathak, Baiqi Li, Jiayao Li, Xide Xia, Graham Neubig, Pengchuan Zhang, and Deva Ramanan. Evaluating text-to-visual generation with image-to-text generation. In *ECCV*, 2024. [1](#), [2](#)
- [5] Ilya Loshchilov and Frank Hutter. Decoupled weight decay regularization, 2017. [1](#)
- [6] Dustin Podell, Zion English, Kyle Lacey, Andreas Blattmann, Tim Dockhorn, Jonas Müller, Joe Penna, and Robin Rombach. Sdxl: Improving latent diffusion models for high-resolution image synthesis. *arXiv preprint arXiv:2307.01952*, 2023. [6](#)
- [7] Robin Rombach, Andreas Blattmann, Dominik Lorenz, Patrick Esser, and Björn Ommer. High-resolution image synthesis with latent diffusion models. In *CVPR*, 2022. [1](#)
- [8] Olaf Ronneberger, Philipp Fischer, and Thomas Brox. U-net: Convolutional networks for biomedical image segmentation. In *MICCAI*, 2015. [1](#)
- [9] Christoph Schuhmann, Romain Beaumont, Richard Vencu, Cade Gordon, Ross Wightman, Mehdi Cherti, Theo Coombes, Aarush Katta, Clayton Mullis, Mitchell Wortsman, et al. Laion-5b: An open large-scale dataset for training next generation image-text models. In *NeurIPS*, 2022. [1](#)
- [10] Gemma Team, Morgane Riviere, Shreya Pathak, Pier Giuseppe Sessa, Cassidy Hardin, Surya Bhupatiraju, Léonard Hussenot, Thomas Mesnard, Bobak Shahriari, Alexandre Ramé, et al. Gemma 2: Improving open language models at a practical size. *arXiv preprint arXiv:2408.00118*, 2024. [1](#)
- [11] The Mosaic ML Team. Stable diffusion training with mosaicml. *Mosaic Research Blog*, 2023. [1](#)
- [12] Patrick von Platen, Suraj Patil, Anton Lozhkov, Pedro Cuenca, Nathan Lambert, Kashif Rasul, Mishig Davaadorj, Dhruv Nair, Sayak Paul, William Berman, Yiyi Xu, Steven Liu, and Thomas Wolf. Diffusers: State-of-the-art diffusion models. *GitHub repository*, 2022. [1](#)
- [13] Yanli Zhao, Andrew Gu, Rohan Varma, Liang Luo, Chien-Chin Huang, Min Xu, Less Wright, Hamid Shojanazeri, Myle Ott, Sam Shleifer, et al. Pytorch fsdp: experiences on scaling fully sharded data parallel. *arXiv preprint arXiv:2304.11277*, 2023. [1](#)
